# Supplementary material
Source: PubMed Central journal article supplement (PMC10027284)

# The original blots for Figure 5A in the manuscript:

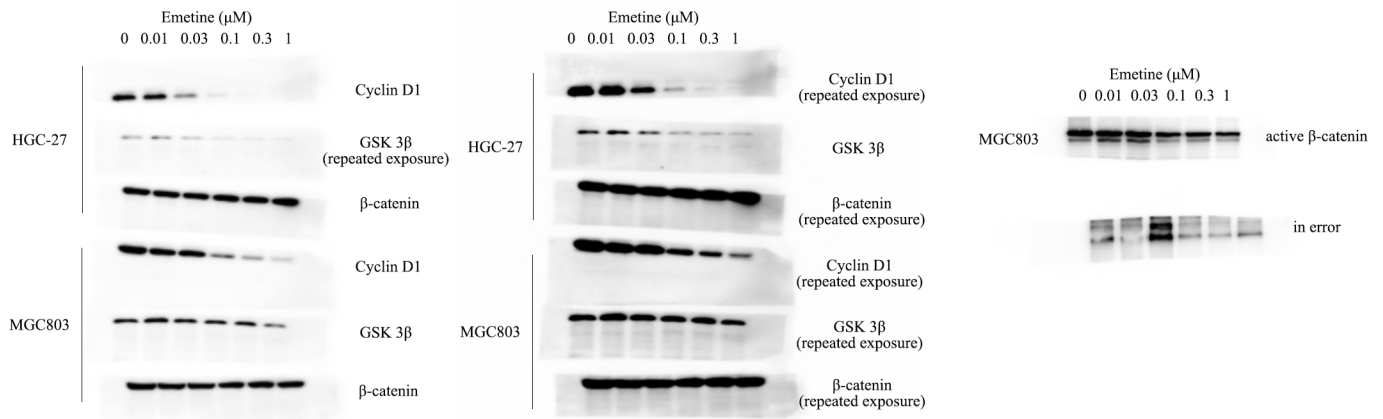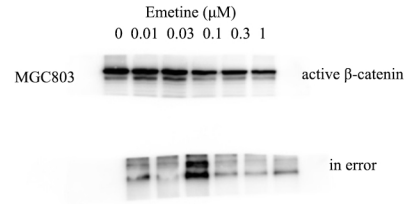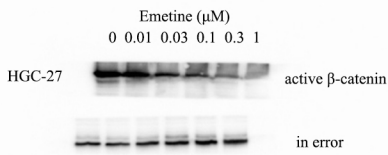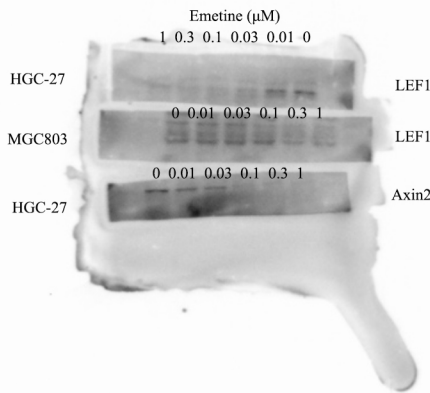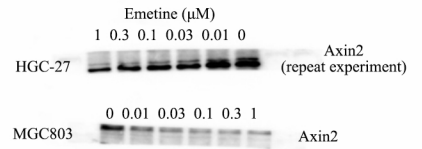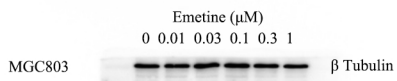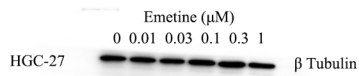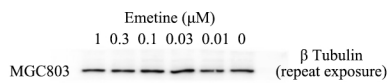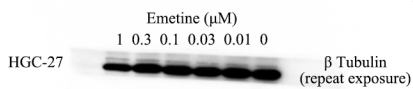

**Figure 5B**

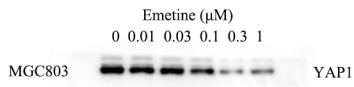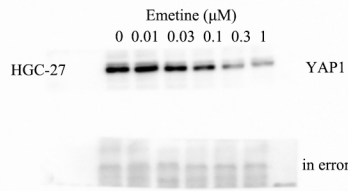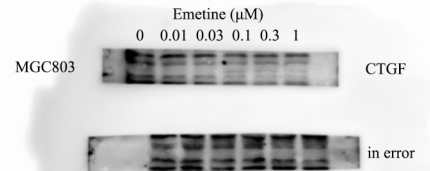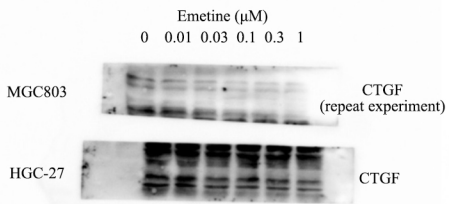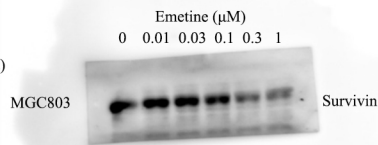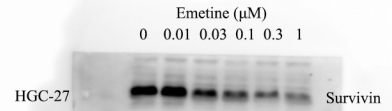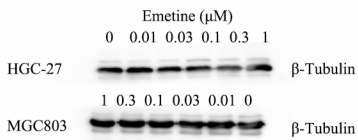

**Figure 5C**

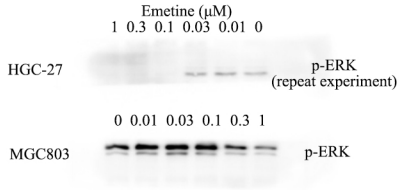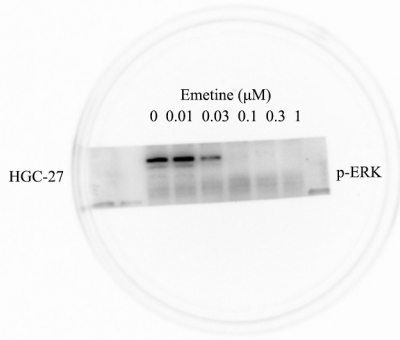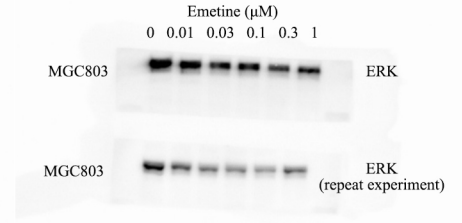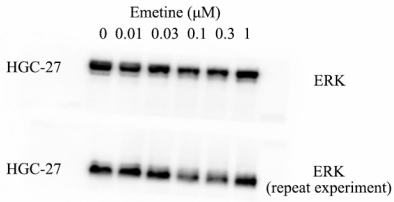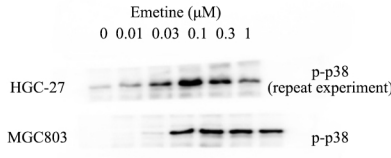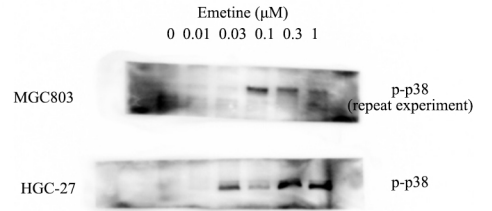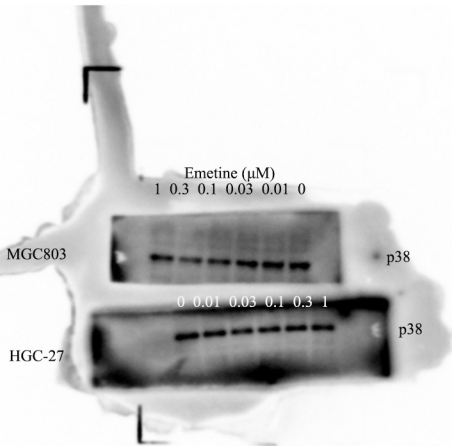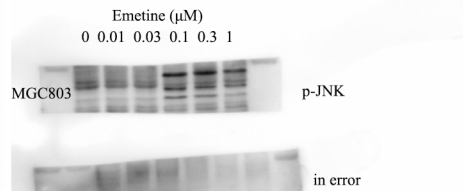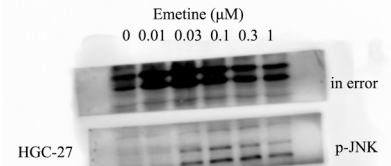

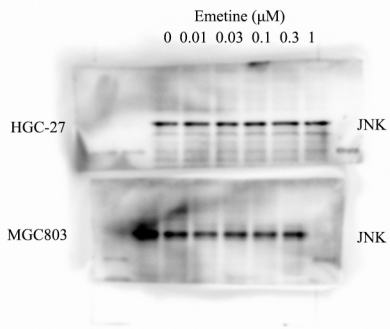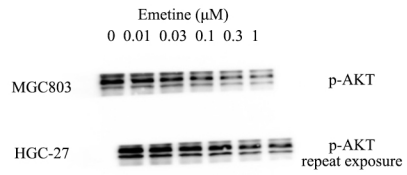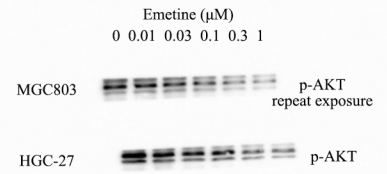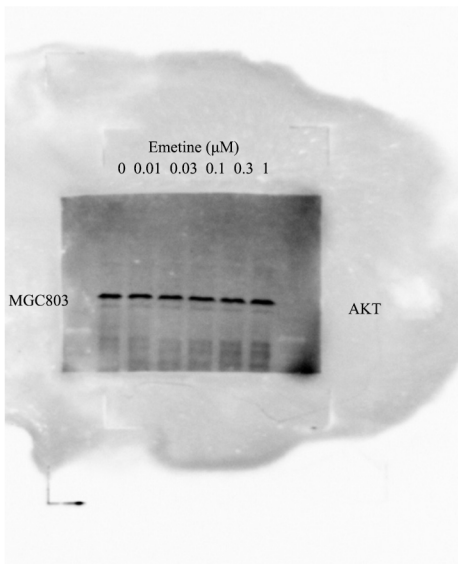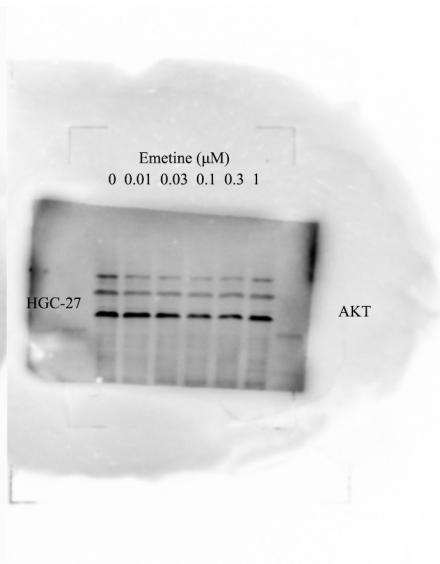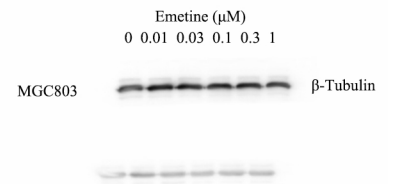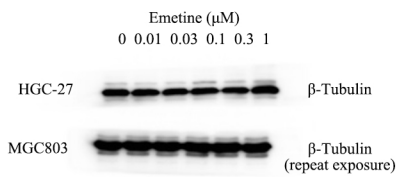

Supplement: 280_2023_4521_MOESM2_ESM.pdf [file 280_2023_4521_MOESM2_ESM.pdf]
